# Supplementary material for: Estimating temporal and spatial variation of ocean surface p CO 2 in the North Pacific using a self-organizing map neural network technique
Source: Copernicus journal article supplement (doi:10.5194/bg-10-6093-2013), 2013-09-26
Supplement: Supplementary file 1 [file bg-10-6093-2013-supplement.pdf]

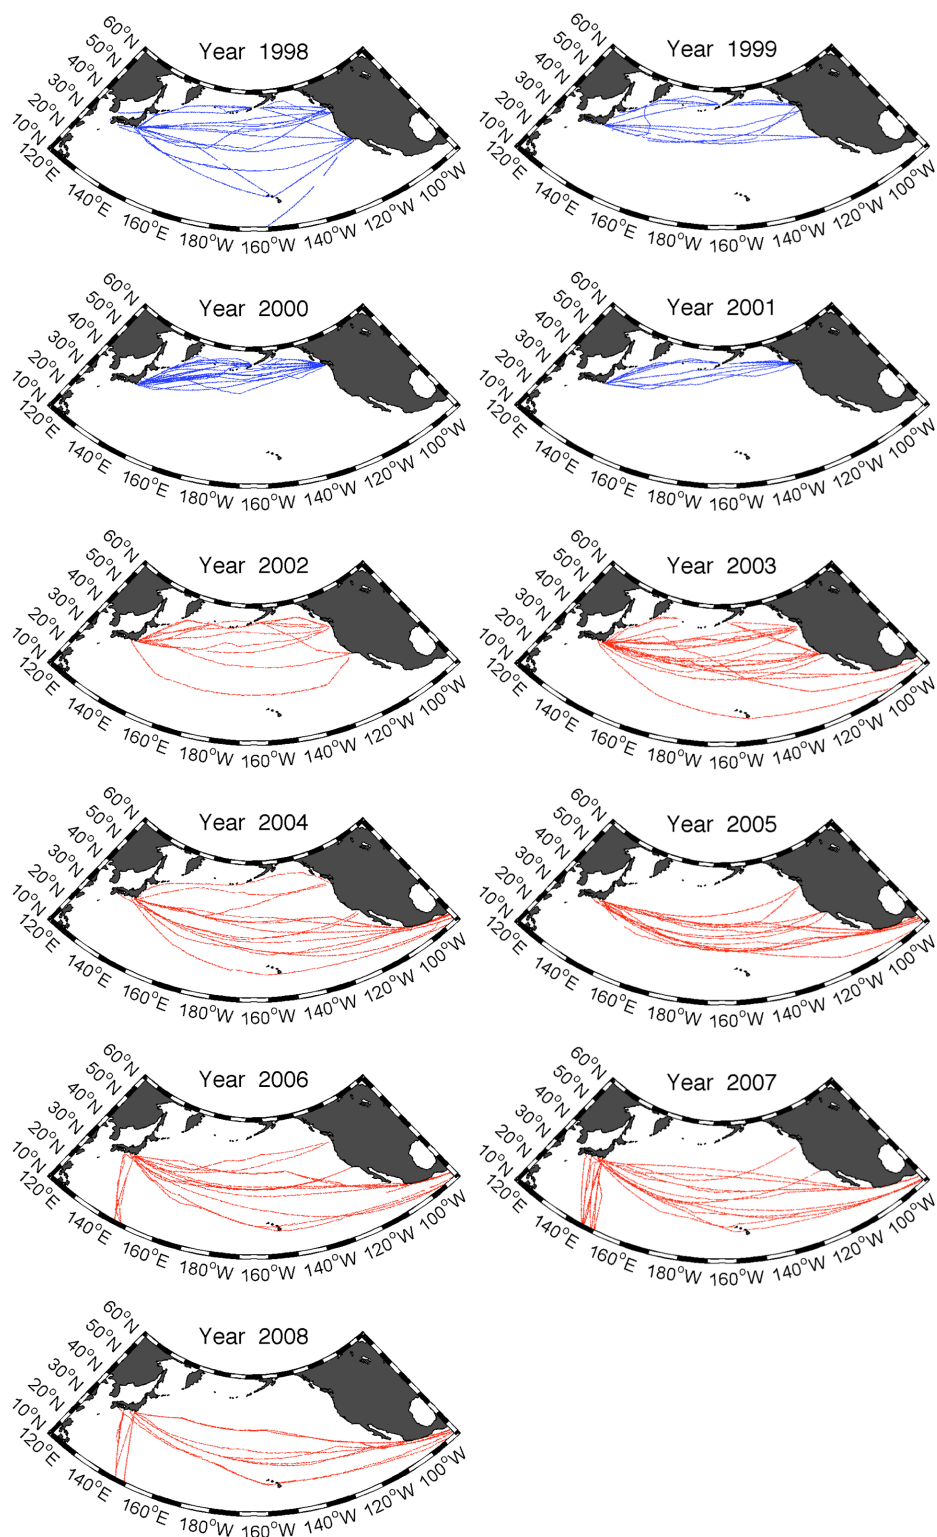

**Supplemental Fig. 1.** Annual cruise tracks since 1998. Blue lines represent the cruises from 1998 to 2001, and red lines show the cruises after 2002.

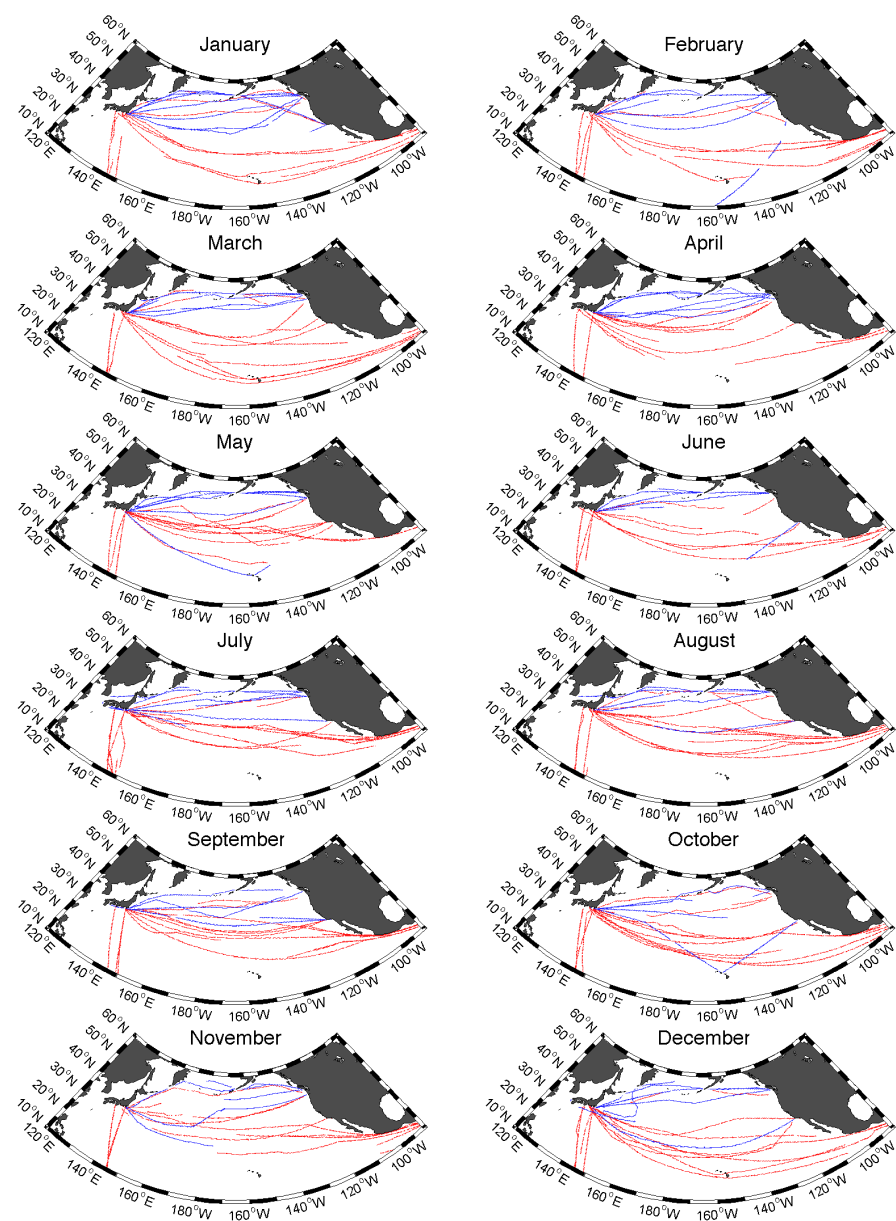

**Supplemental Fig. 2.** Monthly cruise tracks for 1998–2008. Blue lines represent the cruises from 1998 to 2001, and red lines show the cruises after 2002.
